# Supplementary material for: Fascinating and challenging role of tungstate promoted vanadium phosphate towards solvent free esterification of oleic acid
Source: Royal Society of Chemistry journal article supplement (doi:10.1039/c1dt11318f), 2011-12-02
Supplement: c1dt11318f.pdf [file c1dt11318f.pdf]

## Electronic Supplementary Information:

### N<sub>2</sub> adsorption –desorption isotherm of WO<sub>3</sub>-VPO:

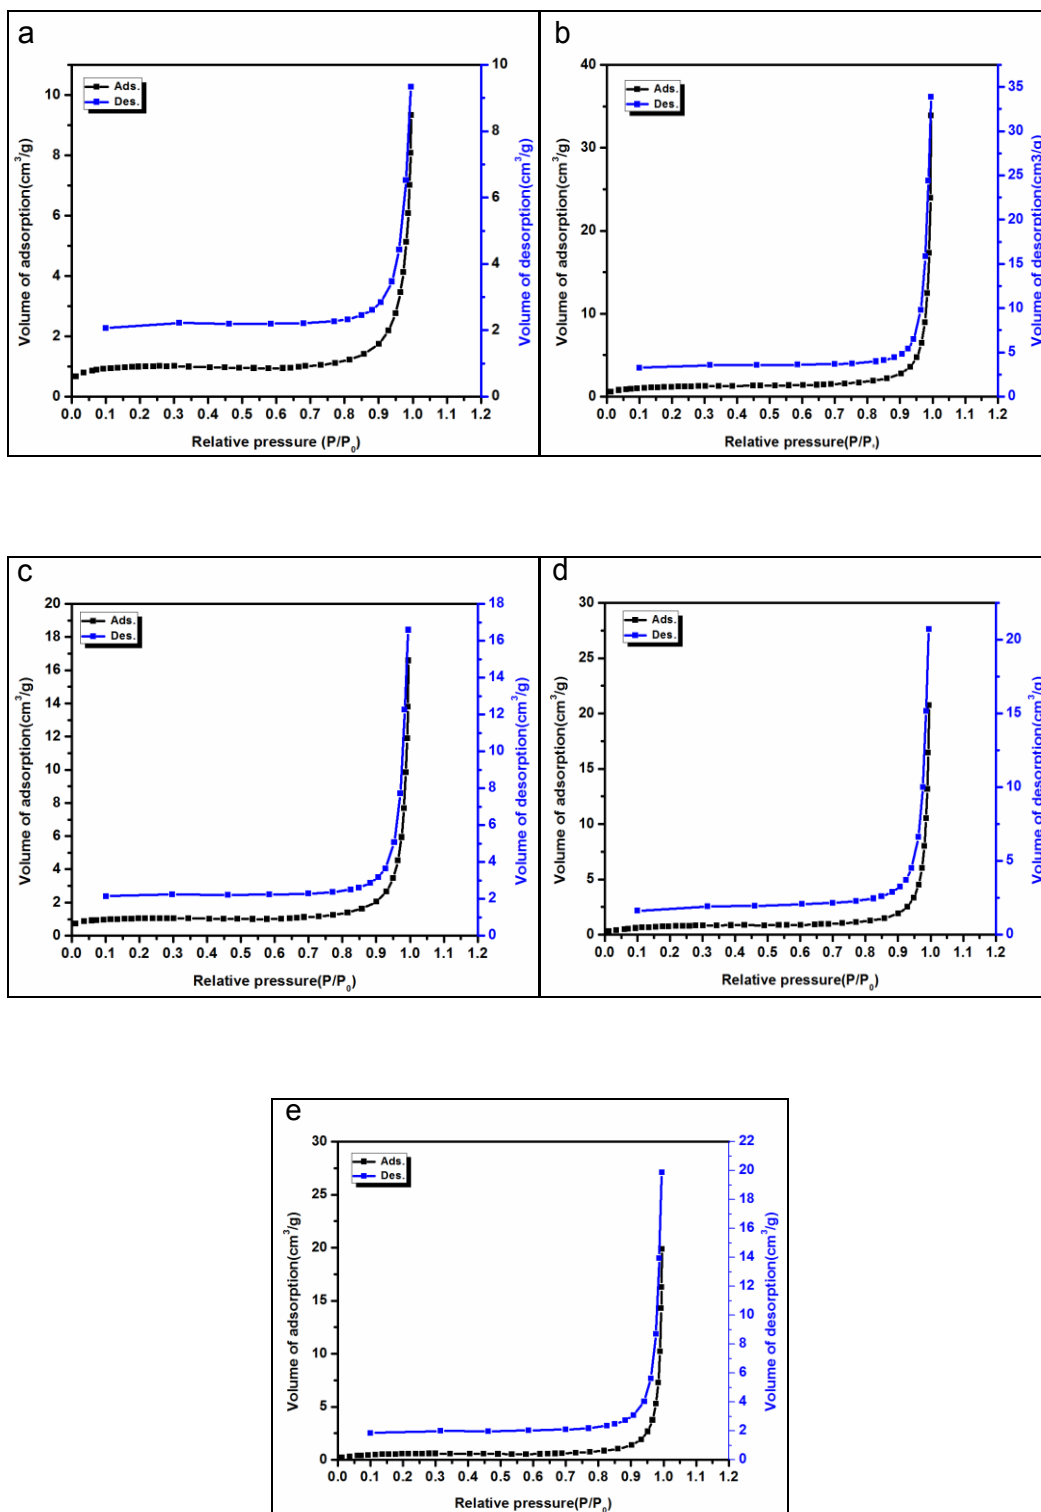

Fig.S1 N<sub>2</sub>-adsorption-desorption isotherm of (a) 5wt% WO<sub>3</sub>-VPO(b) 10wt% WO<sub>3</sub>-VPO(c) 15wt% WO<sub>3</sub>-VPO(d) 20wt% WO<sub>3</sub>-VPO(e) 25wt% WO<sub>3</sub>-VPO

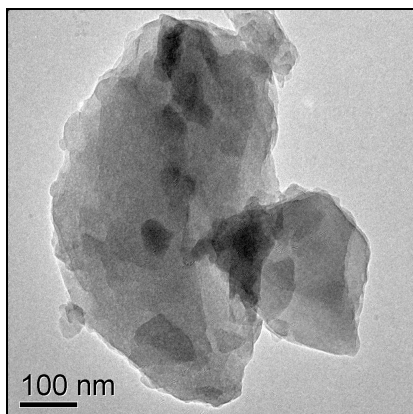

Fig.S2.TEM micrograph of VPO
